# Supplementary material for: Fast solution-phase growth of centimeter-sized Cs3Cu2X5 (X = Cl, I) single crystals for high-performance scintillators
Source: Royal Society of Chemistry journal article supplement (doi:10.1039/d3tc03871h), 2023-12-20
Supplement: d3tc03871h1.pdf [file d3tc03871h1.pdf]

## Electronic supplementary information

### Fast solution-phase growth of centimeter-sized $\text{Cs}_3\text{Cu}_2\text{X}_5$ ( $\text{X}=\text{Cl}, \text{I}$ ) single crystals for high-performance scintillators

Xiangshi Bin,<sup>‡ab</sup> Jiaying Liu,<sup>‡ab</sup> Ruosheng Zeng,<sup>a</sup> Hongbang Liu,<sup>\*a</sup> Jialong Zhao,<sup>\*a</sup> Tao Lin<sup>\*ab</sup>

a School of Physical Science and Technology, Laboratory of Optoelectronic Materials and Detection Technology, Guangxi Key Laboratory for Relativistic Astrophysics, Guangxi University, Nanning 530004, China

b Center on Nanoenergy Research, Guangxi University, Nanning 530004, China

\*Correspondence: correspondence to E-mail: [liuhb@gxu.edu.cn](mailto:liuhb@gxu.edu.cn);

[zhaojl@ciomp.ac.cn](mailto:zhaojl@ciomp.ac.cn); [taolin@gxu.edu.cn](mailto:taolin@gxu.edu.cn);

<sup>‡</sup>These authors contribute equally to this work.

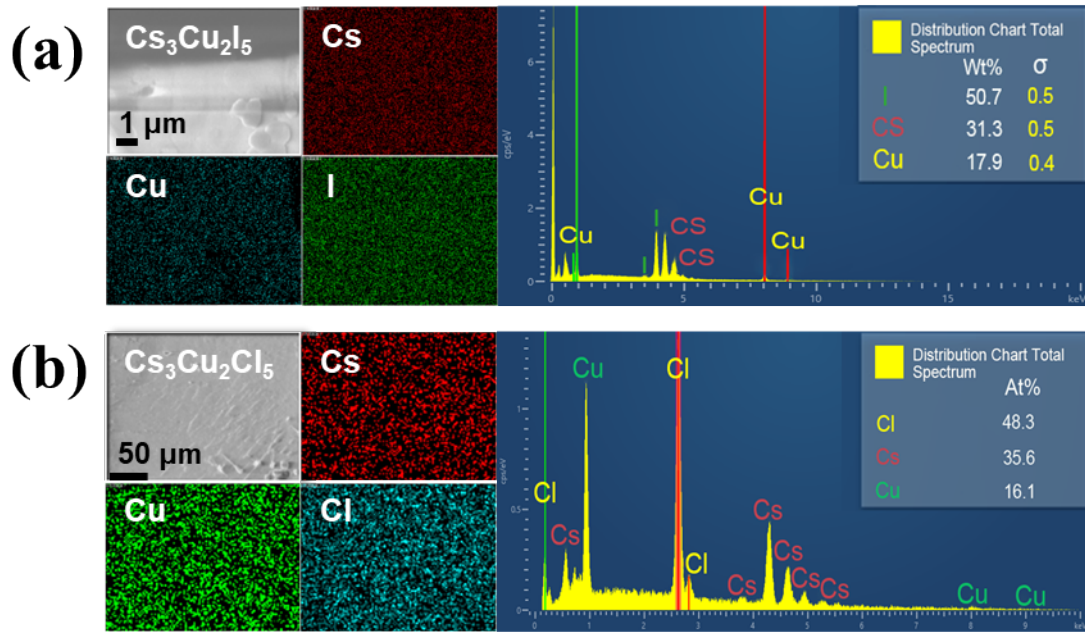

**Fig. S1.** SEM and EDS scans of (a)  $\text{Cs}_3\text{Cu}_2\text{Cl}_5$  and (b)  $\text{Cs}_3\text{Cu}_2\text{I}_5$  single crystals (SCs). The atomic ratios of Cs:Cu:Cl/I in both samples were close to 3:2:5.

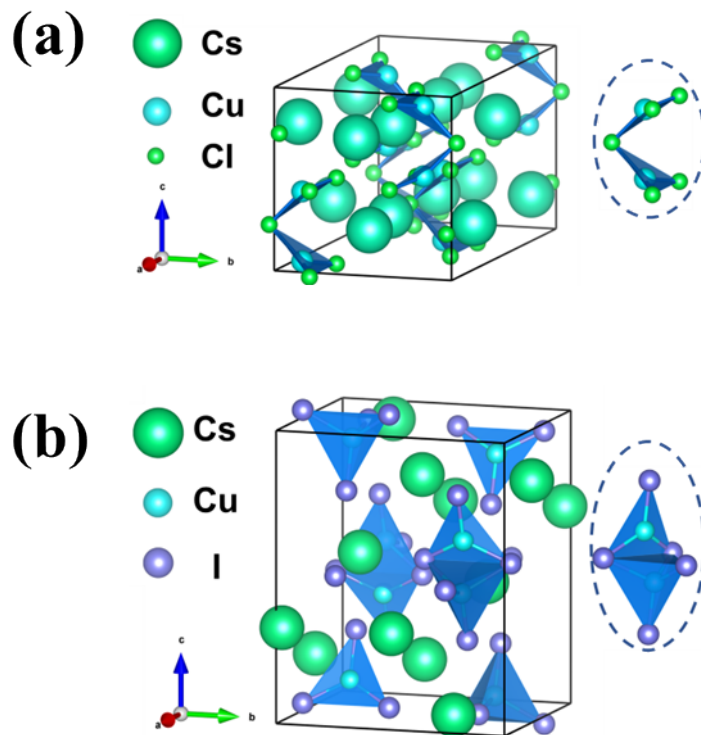

**Fig. S2.** (a) Crystal structure of  $\text{Cs}_3\text{Cu}_2\text{Cl}_5$  SCs: The  $[\text{Cu}_2\text{Cl}_5]^{3-}$  basic units in the unit cell contains two  $\text{Cu}^+$  ions and five  $\text{Cl}^-$  ions. One  $\text{Cu}^+$  ion coordinate with three  $\text{Cl}^-$  ions to forming a planar configuration. By sharing a  $\text{Cl}$  atom, two planes connect to create a folded  $[\text{Cu}_2\text{Cl}_5]^{3-}$  dimer. These dimers are separated by large  $\text{Cs}^+$  ions, resulting in a unique 0D structure. (b) Crystal structure of  $\text{Cs}_3\text{Cu}_2\text{I}_5$  SCs: There are two sites for  $\text{Cu}^+$  ions in one  $[\text{Cu}_2\text{I}_5]^{3-}$  basic unit. In one site, the  $\text{Cu}^+$  ion coordinates with three  $\text{Cl}^-$  ions, forming a planar triangle. In the other site, the  $\text{Cu}^+$  ion coordinates with four  $\text{Cl}^-$  ions, forming a tetrahedron. These two geometries are connected by sharing two  $\text{Cl}^-$  ions, resulting in a complete  $[\text{Cu}_2\text{Cl}_5]^{3-}$  unit. These  $[\text{Cu}_2\text{I}_5]^{3-}$  basic units are separated by  $\text{Cs}^+$  ions to form a 0D structure.

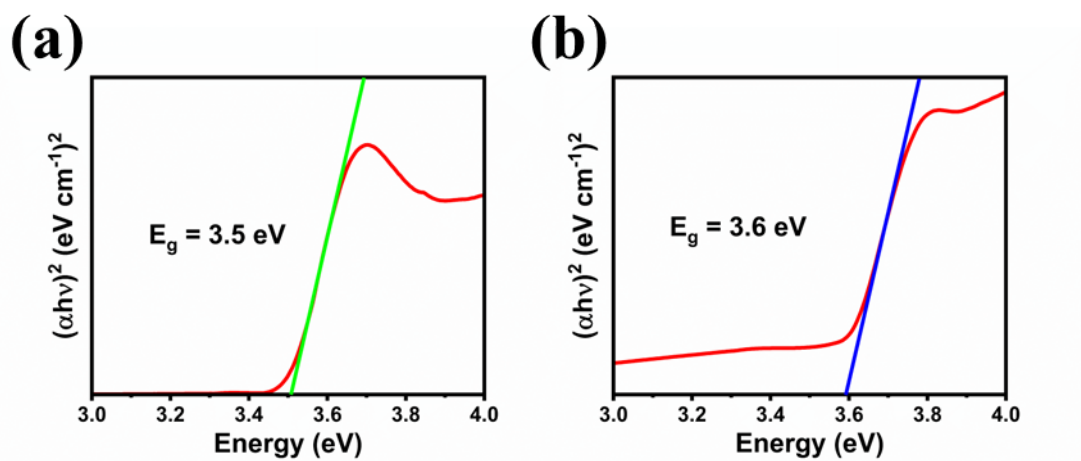

**Fig. S3.** Bandgaps of (a)  $\text{Cs}_3\text{Cu}_2\text{Cl}_5$  SCs and (b)  $\text{Cs}_3\text{Cu}_2\text{I}_5$  SCs as determined from Tauc plots.

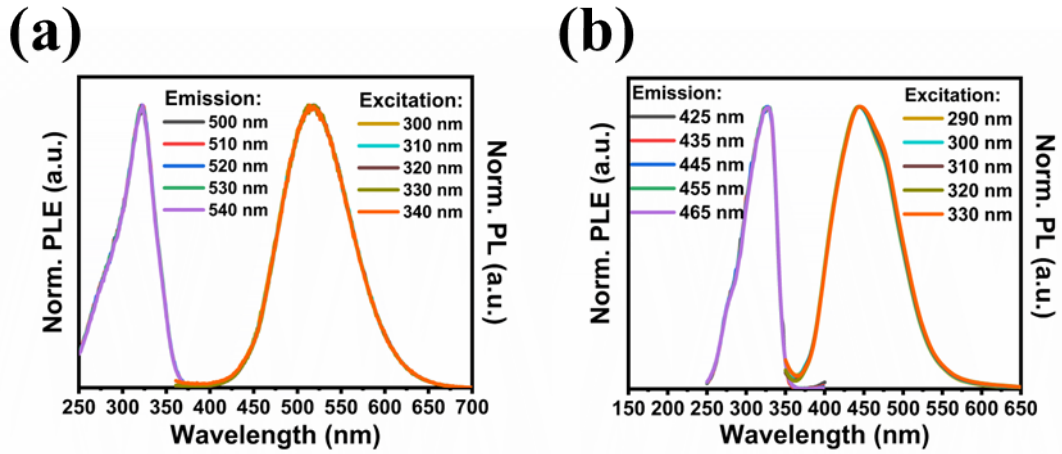

Fig. S4. The emission bands observed were approximately (a) 400 nm to 700 nm for  $\text{Cs}_3\text{Cu}_2\text{Cl}_5$  and (b) 350 nm–650 nm for  $\text{Cs}_3\text{Cu}_2\text{I}_5$ . The positions and shapes of the emission bands remained consistent when the excitation wavelength was varied within a range covering the absorption edges. The excitation bands for each sample, covering a series of detecting wavelengths involved in the emission bands, showed the same position and shape.

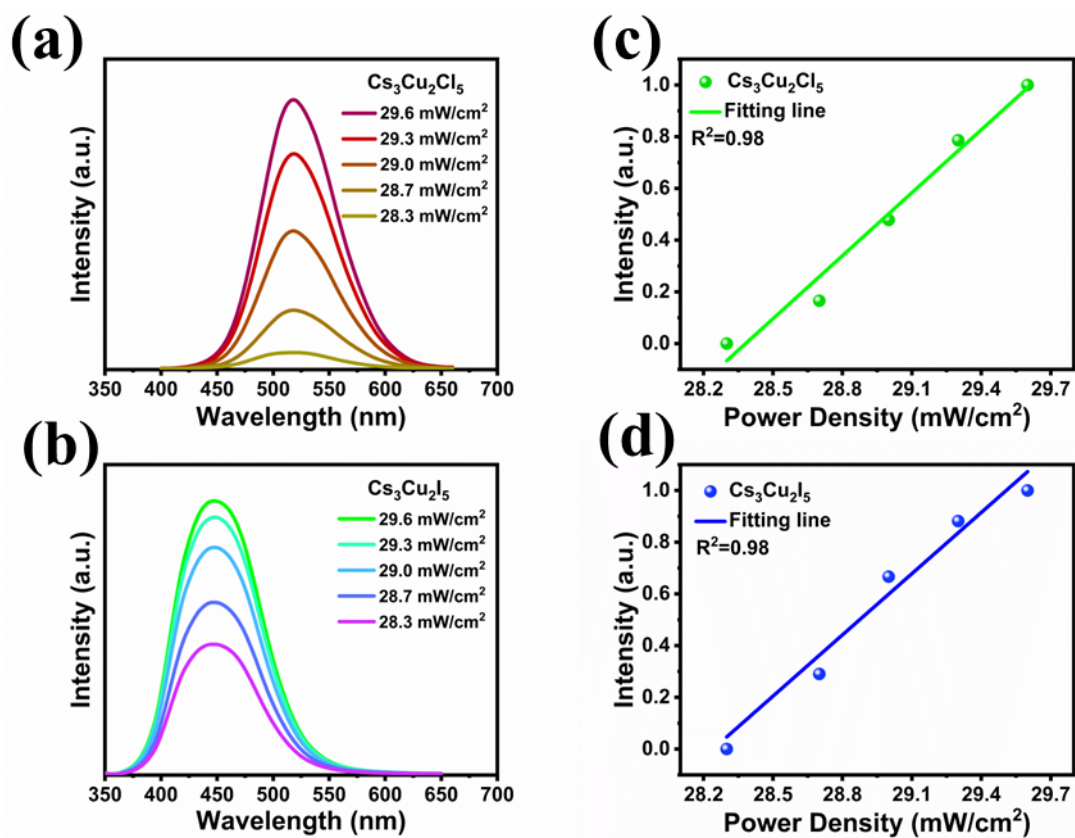

**Fig. S5.** PL spectra of (a)  $\text{Cs}_3\text{Cu}_2\text{Cl}_5$  SCs and (b)  $\text{Cs}_3\text{Cu}_2\text{I}_5$  SCs with variable power density, the clear signs of PL saturation under high-power excitation would be observed. (c) PL intensity increased linearly with the excitation power density of  $\text{Cs}_3\text{Cu}_2\text{Cl}_5$  SCs and (d)  $\text{Cs}_3\text{Cu}_2\text{I}_5$  SCs.

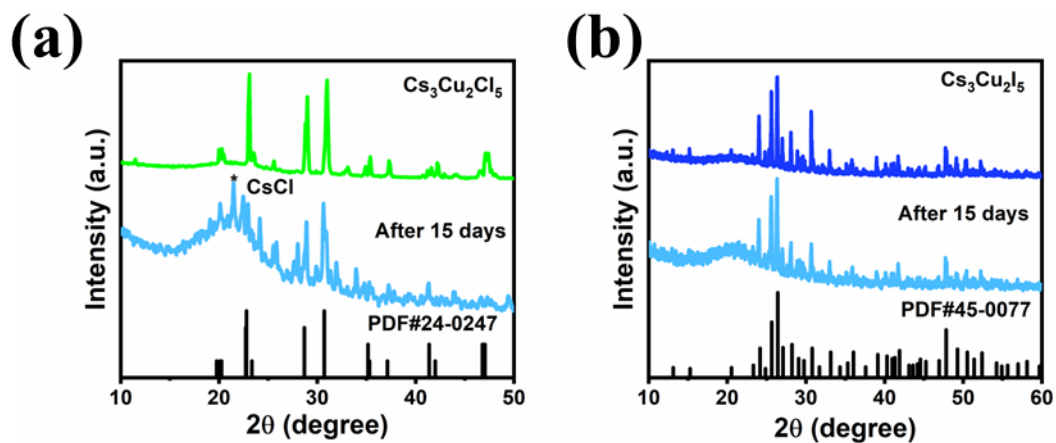

**Fig. S6.** XRD patterns of (a)  $\text{Cs}_3\text{Cu}_2\text{Cl}_5$  and (b)  $\text{Cs}_3\text{Cu}_2\text{I}_5$  including the as-prepared samples and ones exposed to air for 15 days. This RL quenching is primarily attributed to the decomposition of cesium-copper(I) halides, as a clearer phase ascribable to CsCl was observed in the  $\text{Cs}_3\text{Cu}_2\text{Cl}_5$ -PMMA sample.
